# Supplementary material for: Capturing aerosol droplets with fibers
Source: Royal Society of Chemistry journal article supplement (doi:10.1039/c9sm01205b), 2019-01-01
Supplement: c9sm01205b3.pdf [file c9sm01205b3.pdf]

## Supplementary information: Capturing aerosol droplets with fibers

R. Labbé and C. Duprat

*LadHyX, Department of Mechanics, CNRS,  
École polytechnique, 91128 Palaiseau, France*

(Dated: July 19, 2019)

## MIST COLLECTION ON A SINGLE FIBER

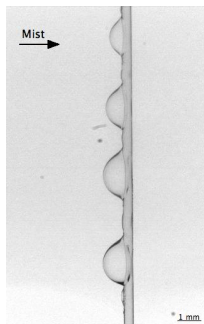

FIG. 1. Movie S1: Mist collection onto a single fiber of diameter  $d_f = 400\mu\text{m}$ .

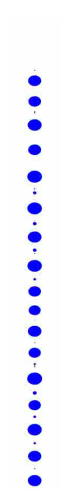

FIG. 2. Movie S2: Numerical model of drop growth and coalescence.

## INCLINED FIBERS

We use the same single fiber setup to determine the effect of fiber inclination on the maximal drop size  $R_{df}$  (Fig. S4 a). In parallel, we measure the collection rate of a net composed of inclined fibers (Fig. S4 b). We use the maximal drop size to evaluate  $St_{drop}$  and predict the efficiency  $E_{drop}$  as described in the main text. While the values at large

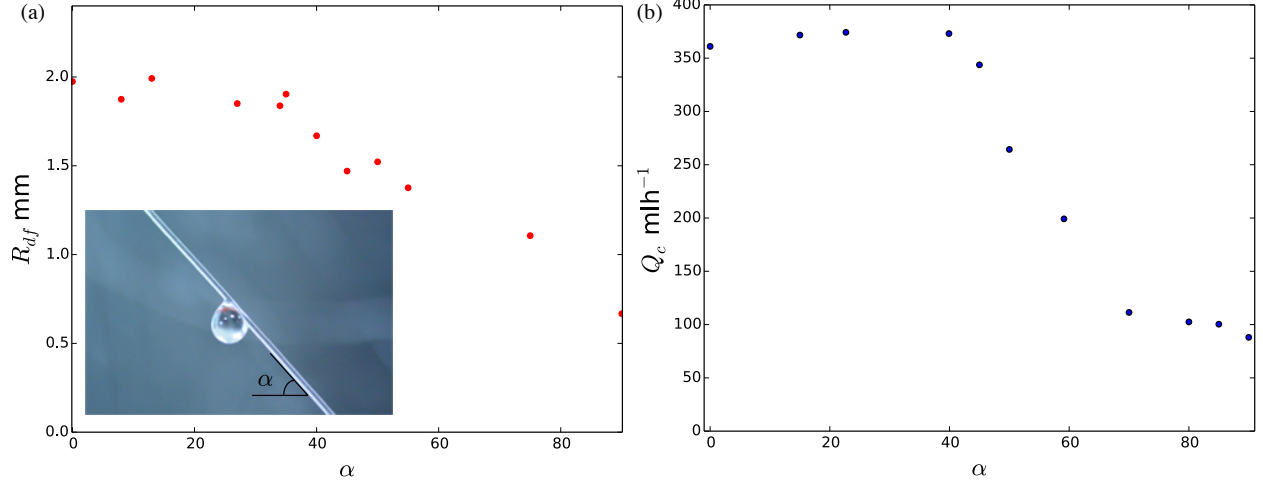

FIG. 3. a) Maximal drop size as a function on inclination angle  $\alpha$  for a fiber of diameter  $d_f = 300 \mu\text{m}$ . b) Collection flow rate for a net composed of inclined fibers of diameter  $d_f = 300 \mu\text{m}$  as a function of  $\alpha$ .

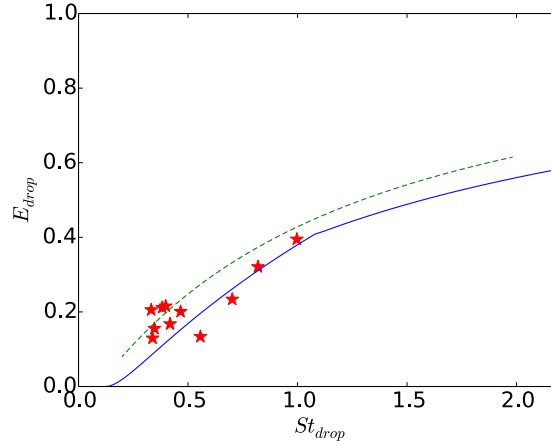

FIG. 4. Collection efficiency with inclined fibers of diameter  $d_f = 300 \mu\text{m}$  and varying flow velocity; experimental data (symbols), cylinder model (eq (5-7) (blue line), and spheres model (green dashed line).

Stokes are in excellent agreement with the impaction model (5-7), scatter can be observed at smaller Stokes i.e. large drops that are obtained in nearly horizontal fibers. These large drops more resemble spheres barely affected by the presence of the fiber than cylinders of size  $R_{df}$ . As for cylinders, Langmuir and Blodgett propose a solution for an assembly of spheres (eqs (50)-(53) in ref [8]). We plot this solution alongside our experiments in Fig. S5; the model with spheres agrees well with the experiments at low Stokes number.

## COLUMN FORMATION

If the distance between fibers is reduced, drops can bridge adjacent fibers and induce the formation of long liquid columns (Fig. S5).

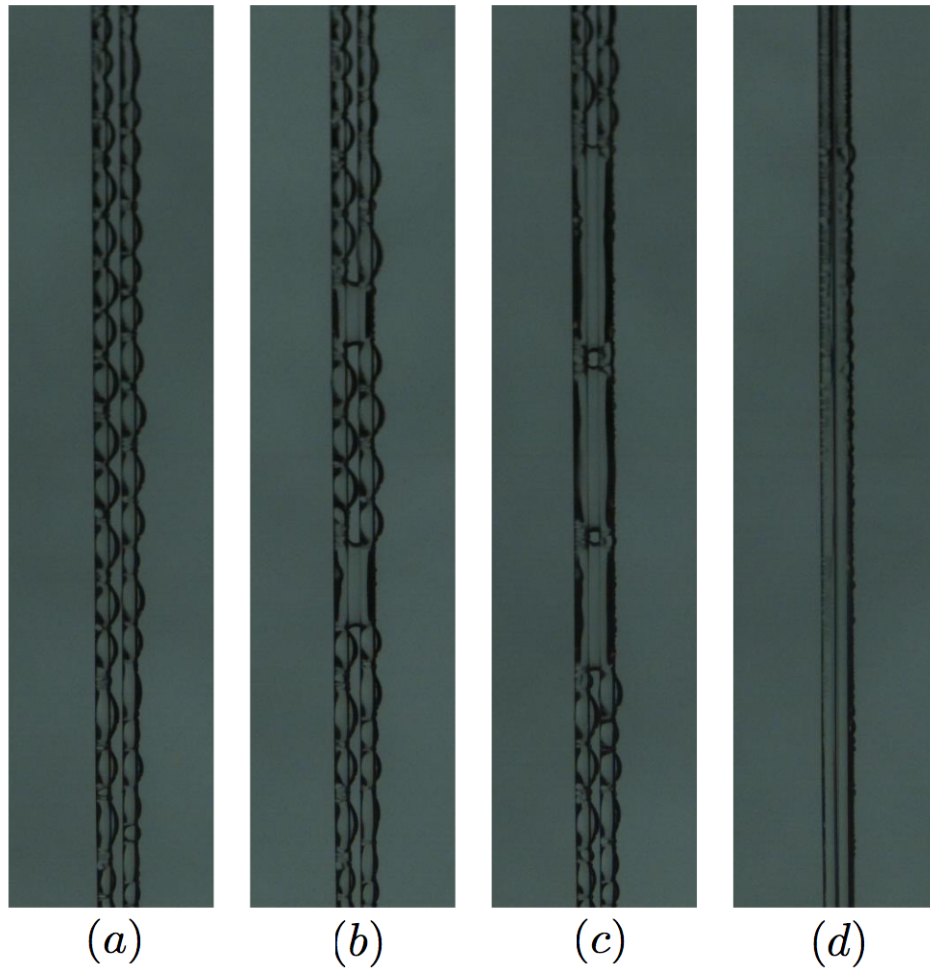

FIG. 5. Drop growth and formation of capillary bridges on close fibers, starting from dry fibers.
